# Supplementary material for: Magnetic/upconversion luminescent mesoparticles of Fe3O4@LaF3:Yb3+, Er3+ for dual-modal bioimaging
Source: Royal Society of Chemistry journal article supplement (doi:10.1039/c2cc36059d), 2012-01-01

## Supporting information

### Magnetic/Upconversion Luminescent Mesoparticles of $\text{Fe}_3\text{O}_4@ \text{LaF}_3: \text{Yb}^{3+}, \text{Er}^{3+}$ for Dual-Modal Bioimaging

Lu Zhang,<sup>a</sup> Ying-Shuai Wang,<sup>a</sup> Yang Yang,<sup>a</sup> Fan Zhang,<sup>a</sup> Wen-Fei Dong,<sup>\*a</sup>

Sheng-Yan Zhou,<sup>b</sup> Wei-Hua Pei,<sup>c</sup> Hong-Da Chen<sup>c</sup> and Hong-Bo Sun,<sup>\*a,d</sup>

<sup>a</sup>State Key Laboratory on Integrated Optoelectronics, College of Electronic Science and Engineering, Jilin University, 2699 Qianjin Street, Changchun 130012, P. R. China. E-mail: dongwf@jlu.edu.cn, hbsun@jlu.edu.cn.

<sup>b</sup>China-Japan Friendship Hospital, Jilin University, 148 Ziyou Road, Changchun 130012, China.

<sup>c</sup>State Key Laboratory on Integrated Optoelectronics, Institute of Semiconductor, Chinese Academy of Sciences, Beijing, 100083

<sup>d</sup>College of Physics, Jilin University, 119 Jiefang Road, Changchun 130023, China. E-mail: hbsun@jlu.edu.cn.

## 1. EXPERIMENTAL SECTION

**1.1 Reagents.** Polyacrylic acid (PAA), iron (III) chloride anhydrous ( $\text{FeCl}_3$ ), diethylene glycol (DEG) and tetraethyl orthosilicate (TEOS, 98%) were purchased from Sigma-Aldrich. Sodium hydroxide (NaOH), ethonal and aqueous ammonia ( $\text{NH}_3 \cdot \text{H}_2\text{O}$ , 28%) ~~cetyltrimethylammoniumbromide (CTAB)~~ were obtained from Beijing Chemical Reagent Factory. Lanthanum nitrate ( $\text{La}(\text{NO}_3)_3 \cdot 6\text{H}_2\text{O}$ , >99.99%), ytterbium nitrate ( $\text{Yb}(\text{NO}_3)_3 \cdot 6\text{H}_2\text{O}$ , >99.99%), erbium nitrate ( $\text{Er}(\text{NO}_3)_3 \cdot 6\text{H}_2\text{O}$ , >99.99%) were purchased from National Engineering Research Centre of Rare Earth Metallurgy and Function Materials. Sodium fluoride (NaF, 98.0%) was purchased from Tianjin Guangfu Fine Chemical Research Institute, China. Thiazolyl Blue Tetrazolium Bromide (MTT) and sodium dodecyl sulfate (SDS) were purchased from Sigma-Aldrich. All reagents were used as received without further purification.

**1.2 Preparation of magnetic nanoparticles.** The  $\text{Fe}_3\text{O}_4$  NPs were produced by using a high temperature hydrolysis reaction.<sup>1</sup> A stock NaOH solution was prepared by dissolving 2.0 g of NaOH in 20 mL of DEG.  $\text{FeCl}_3$  (0.8 mmol), PAA (8 mmol), and DEG (34 mL) were added into a three-necked flask, and the mixed solution was heated to 220 °C for 30 min under nitrogen. The NaOH solution obtained beforehand was then dropped rapidly into the mixture with vigorous mechanical stirring for an additional 1 h. The products were cooled to room temperature and, thereafter, washed with deionized water and ethanol three times via centrifugation.

**1.3 Preparation of magnetic/upconversion luminescent mesoparticles (M/UCL MPs).** 0.55 mmol  $\text{La}(\text{NO}_3)_3 \cdot 6\text{H}_2\text{O}$ , 0.096 mmol  $\text{Yb}(\text{NO}_3)_3 \cdot 6\text{H}_2\text{O}$ , and 0.024 mmol  $\text{Er}(\text{NO}_3)_3 \cdot 6\text{H}_2\text{O}$  were first dissolved in 10 ml aqueous water under stirring at room temperature. After about 10 min, 0.5~3 ml  $\text{Fe}_3\text{O}_4$  NPs solution (8.6 mg/ml) was added into the lanthanide nitrate solution for 30 min stirring. The stock solution of 1.6 mmol NaF in 15 ml aqueous water was injected dropwise into the round-bottomed flask at a rate of 1 ml per minute, and the mixture was kept at 75°C for 2 h under vigorous stirring. Subsequently, the resulting M/UCL MPs

were collected by centrifugation and washed by water for several times. Finally, MUCNPs were heated to 400 °C at a rate of 20 °C per minute, and were kept at this temperature for 1 hour under N<sub>2</sub> atmosphere. After naturally cooling down to room temperature, the up-conversion fluorescent shell was thus formed.

**1.4 Cytotoxicity test.** Human lung adenocarcinoma epithelial cell line A549 were cultured in RPMI-1640 medium (Invitrogen, USA), supplemented with 10% heat-inactivated fetal bovine serum (FBS) and antibiotics at 37 °C in the humidified atmosphere with 5% CO<sub>2</sub>. The Cells were seeded in 96-well plates at a density of 7×10<sup>3</sup> cells/well and grew overnight. Cells of 80% confluent were incubated with fresh media containing M/UCL MPs with different concentrations (v/v) (from 1% to 10%). After 24 hours, 10 μL of MTT solution of 5 mg/mL was added to each well of the 96-well plate for incubation another 4 h. Then cells were lysed with 10% acid SDS solution. The absorbance of supernatants was measured at 600 nm, and the experiment was repeated at least three times.

**1.5 MRI imaging in vitro and vivo.** The MR imaging experiments were performed on a 1.5-T clinical MRI instrument (GE Signa 1.5 T), and the pulse sequence used was a T<sub>2</sub>-weighted fast-recovery fast spin-echo sequence with the following parameters: TR=4000 ms, slice thickness=3.0 mm, TE=98 ms, echo length=15 ms, FOV=200 mm, matrix = 256×256. M/UCL MP solutions of different concentrations (0, 15.6, 31.2 62.5, 125~250 μg/mL) were placed in centrifuge tubes for T<sub>2</sub>-weighted MR imaging. The concentration of Fe was determined by inductively coupled plasma–mass spectrometry (ICP). T<sub>2</sub> relaxivities were calculated through the curve of 1/T<sub>2</sub> relaxation time versus the Fe concentration. The solution of M/UCL MP (125 μg/mL, 200 μl) was injected into the mouse via tail vein injection, and the mice of pre- and post-injection were scanned.

**1.6 UCL imaging in vitro and vivo.** Up-conversion fluorescent spectra were measured on an LS-50B fluorescence spectrometer (Perkin-Elmer Corp., Forster City, CA, USA) with an external 980 nm laser (260 mW, Beijing Hi-Tech Optoelectronic Corp., Beijing, China) as the excitation source in place of the

xenon lamp in the spectrometer. A fluorescence detection device equipped with digital camera and 980 nm laser was built in the laboratory. The mouse was killed at 30 min after the vein tail injection of M/UCL MP solution. The liver was collected and frozen immediately to obtain a 50  $\mu\text{m}$ -thick frozen section. The digital photos of the liver section were taken.

**1.7 Characterizations.** TEM images were used to investigate the morphology of the MUCNPs taken with a Hitachi H-8100IV Transmission Electron Microscope operated at 200 kV. The crystal structure was characterized by X-ray diffraction (XRD) (Philips X'pert PRO) analysis. Magnetic measurements were carried out using a TDM-B vibrating sample magnetometer (VSM) at 300 K. The elemental ratio of the prepared nanocomplex was characterized by energy dispersive X-ray spectrometry (EDX). Inductively coupled plasma spectrometry (ICP, X-7, Thermo Elemental, USA) was used to determine the silver concentrations of the nanorods. Bacterial cultures were measured by optical density measurements at 600 nm (OD600) using a UV/Vis spectrophotometer (Hitachi).

## Reference

- 1 H. Xia, L. Zhang, Q. D. Chen, L. Guo, H. H. Fang, X. B. Li, J. F. Song, X. R. Huang, H. B. Sun, *J. Phys. Chem. C.*, 2009, **113**, 18542.

**Figure S1.** Square-wave curve of the changes in UV-Vis absorption peak intensity of  $\text{Fe}_3\text{O}_4@\text{LaF}_3:\text{Yb}^{3+},\text{Er}^{3+}$  MPs solution before and after magnetic separation for 10 times.

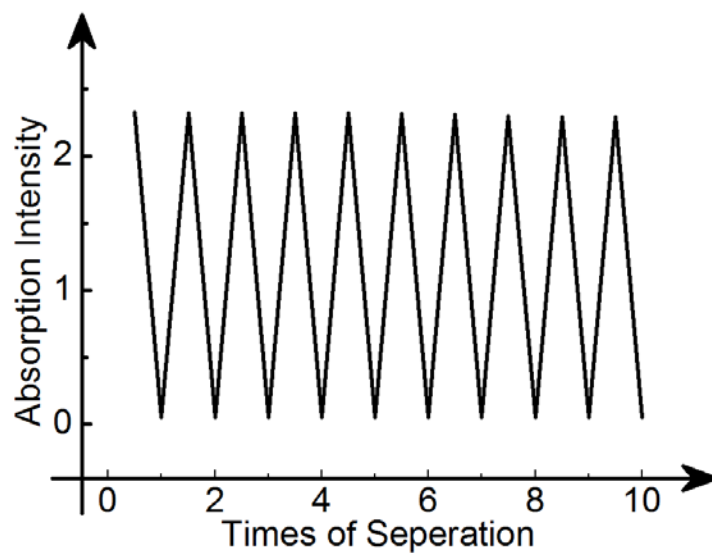

**Figure S2.** Simplified energy level diagram and possible up-conversion mechanisms for the  $\text{Fe}_3\text{O}_4@\text{LaF}_3:\text{Yb}^{3+},\text{Er}^{3+}$  MPs.

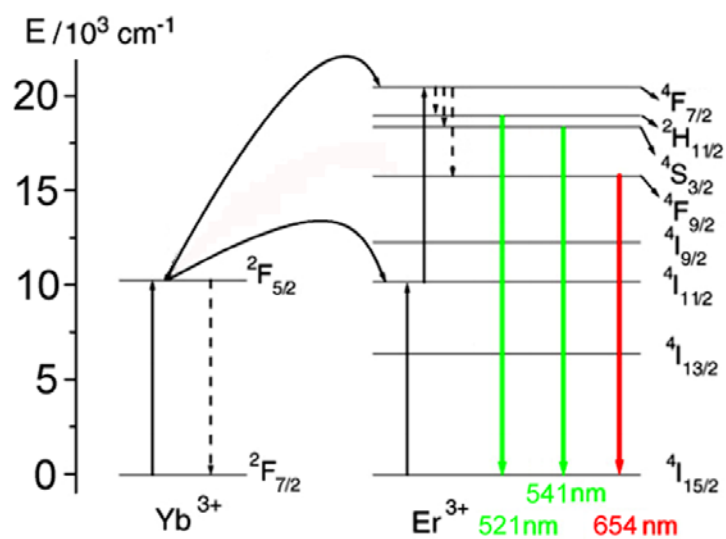

**Figure S3.** Up-conversion fluorescence spectra of  $\text{Fe}_3\text{O}_4@\text{LaF}_3:\text{Yb}^{3+},\text{Er}^{3+}$  MPs with varying doping concentration of  $\text{Er}^{3+}$  versus  $\text{Yb}^{3+}$  (mass ratio) after excitation at 980 nm after annealing at 400 °C for 1 h.

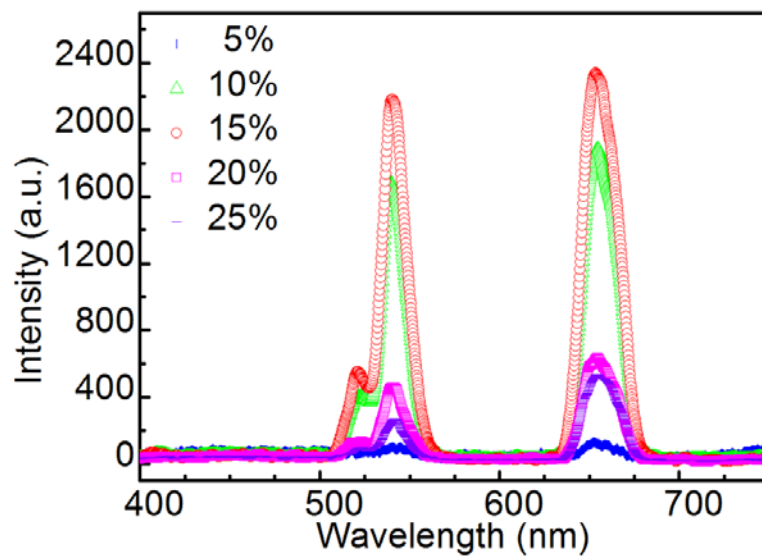

**Figure S4.** Cytotoxicity of  $\text{Fe}_3\text{O}_4@\text{LaF}_3:\text{Yb}^{3+},\text{Er}^{3+}$  MPs. The viability of A549 cells incubated with different concentrations of  $\text{Fe}_3\text{O}_4@\text{LaF}_3:\text{Yb}^{3+},\text{Er}^{3+}$  MPs for 24 h.

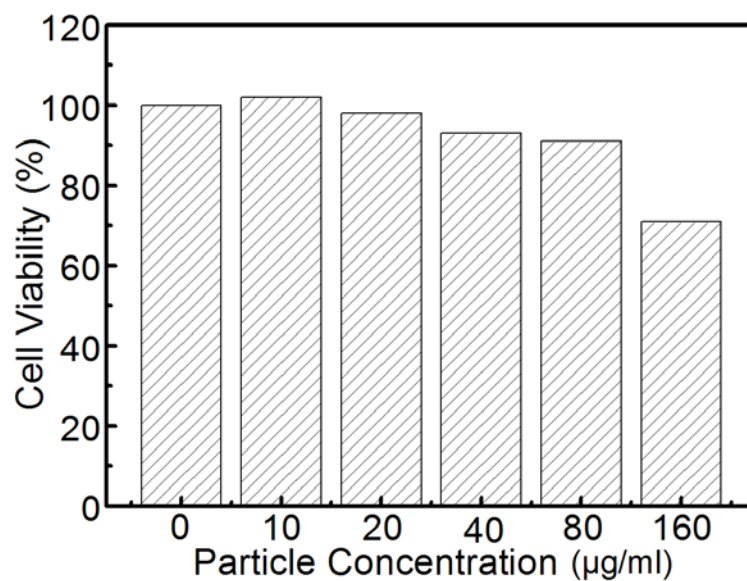

**Figure S5.** (a) Pre- and (b) post-injection MR imaging of a transplanted tumor on the shoulder of a mouse.  $\text{Fe}_3\text{O}_4@ \text{LaF}_3: \text{Yb}^{3+}, \text{Er}^{3+}$  MPs were injected into the tumor site.

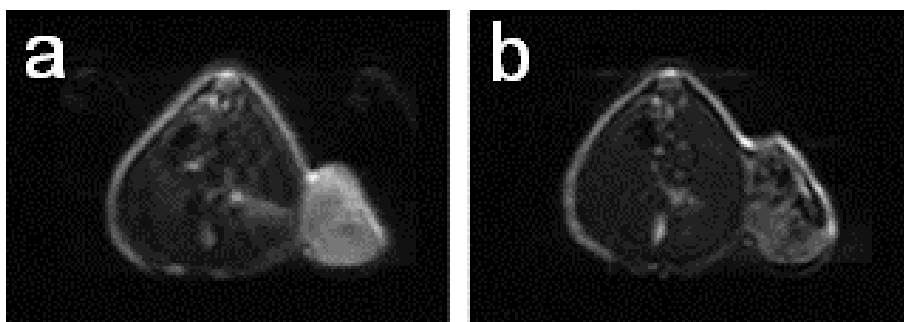

**Figure S6.** Digital photography of the frozen section of  $\text{Fe}_3\text{O}_4@ \text{LaF}_3: \text{Yb}^{3+}, \text{Er}^{3+}$  MPs loaded liver without (a) and with (b) 980 nm laser excitation.

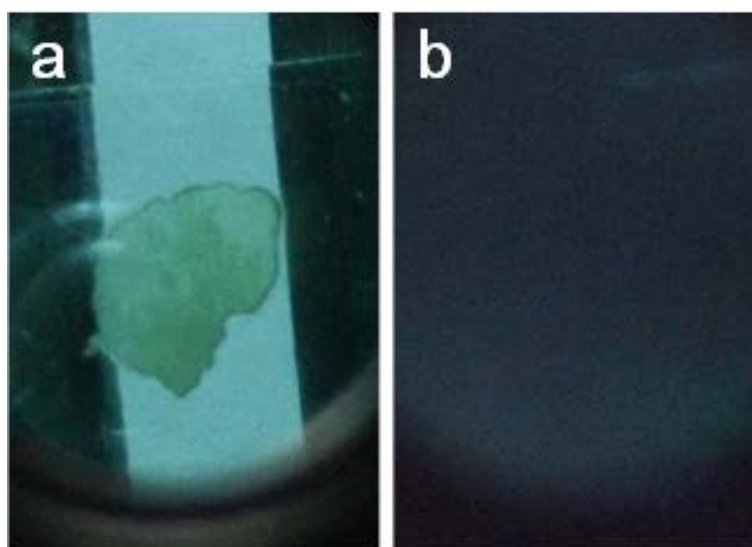

Supplement: c2cc36059d.pdf [file c2cc36059d.pdf]
